# Supplementary material for: A simple retinal mechanism contributes to perceptual interactions between rod- and cone-mediated responses in primates
Source: eLife journal article supplement (doi:10.7554/elife.08033), 2015-06-22

**A**

| Stimuli                        | Blue LED  | Red LED  | Blue phosphor | Red phosphor |
|--------------------------------|-----------|----------|---------------|--------------|
| Peak wavelength (nm)           | 460       | 642      | 444           | 640          |
| Rods ( $R^*$ /rod/flash)       | 1-4       | 0.1-0.24 | 0.5-1.5       | 0.09-0.3     |
| L-cones ( $R^*$ /L-cone/flash) | 0.17-0.67 | 7-16     | 0.07-0.17     | 2.8-9.4      |

*Electrophysiology*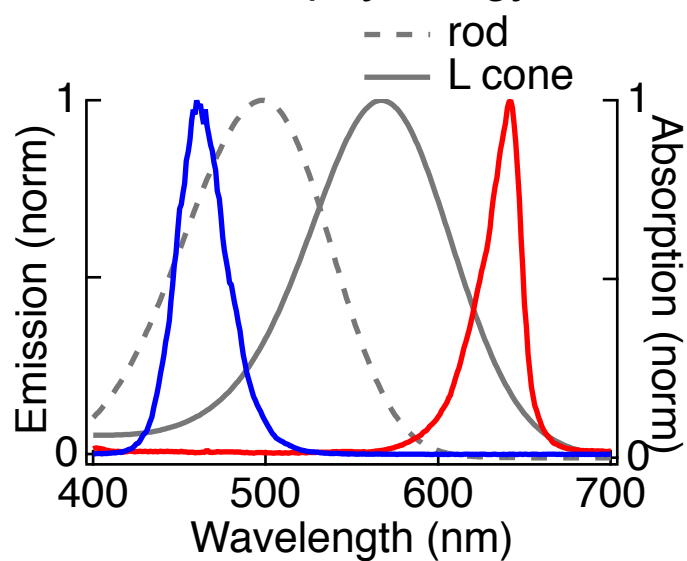*Perception*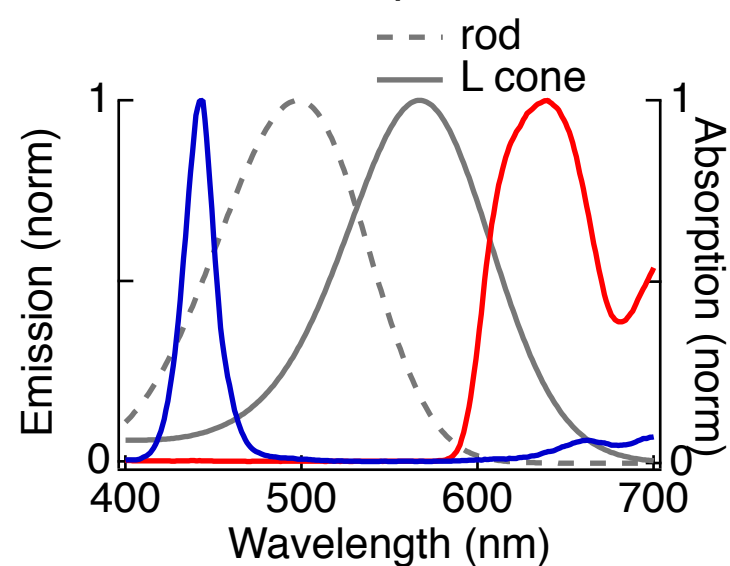*increasing background***B**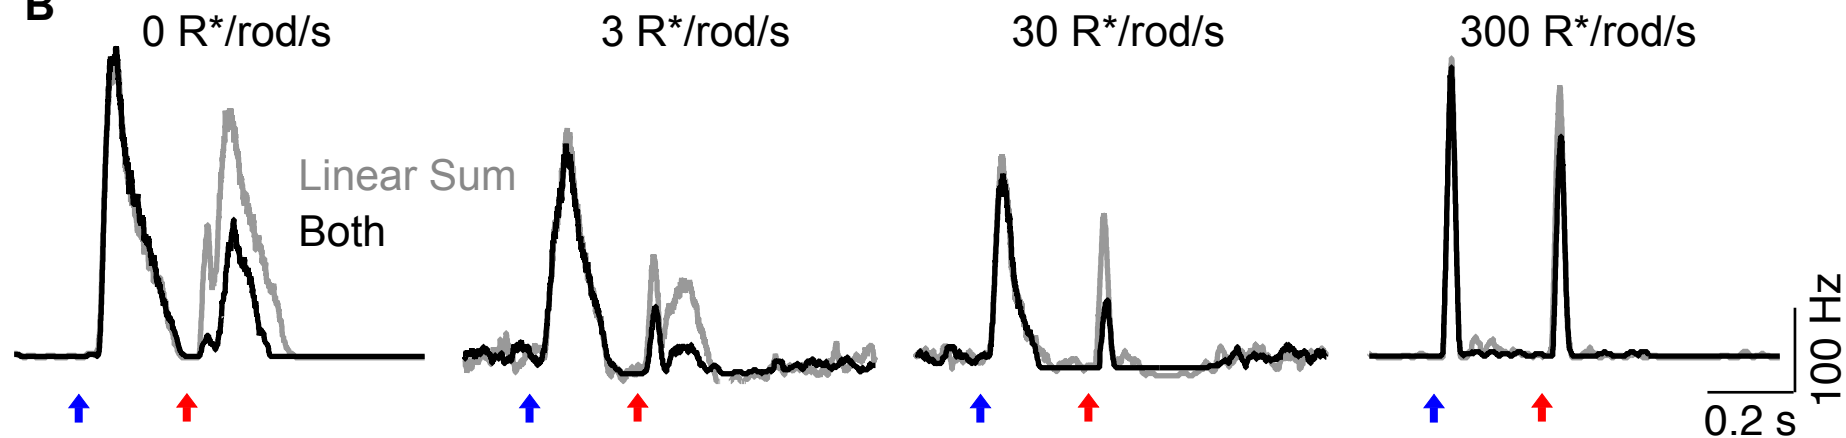

Supplement: supp [file elife-08033-supp-v1.zip]
