# Supplementary figures and images for: A simple retinal mechanism contributes to perceptual interactions between rod- and cone-mediated responses in primates
Source: eLife journal article supplement (doi:10.7554/elife.08033), 2015-06-22

**A**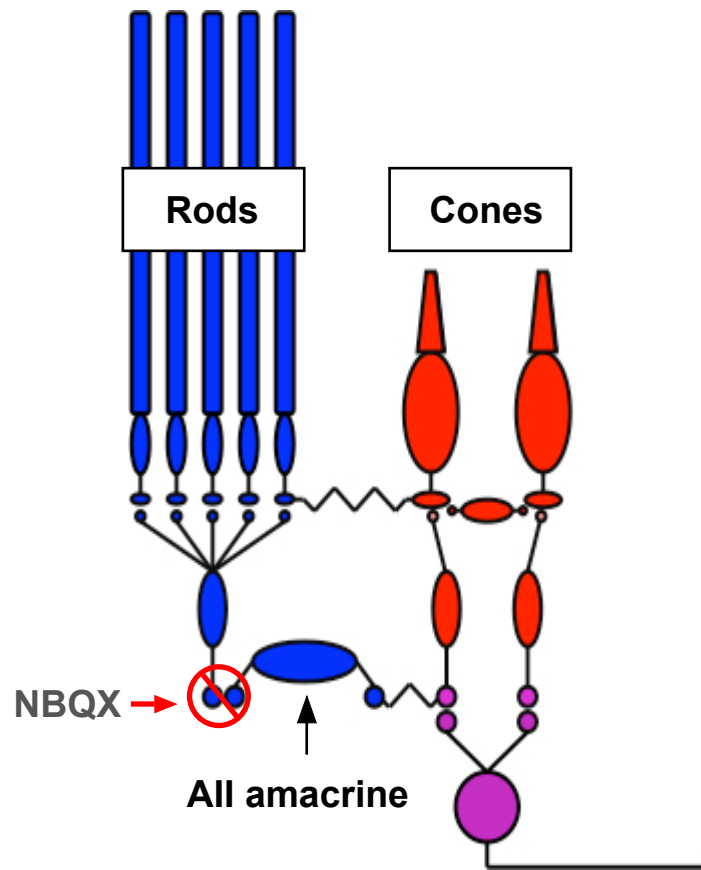**B**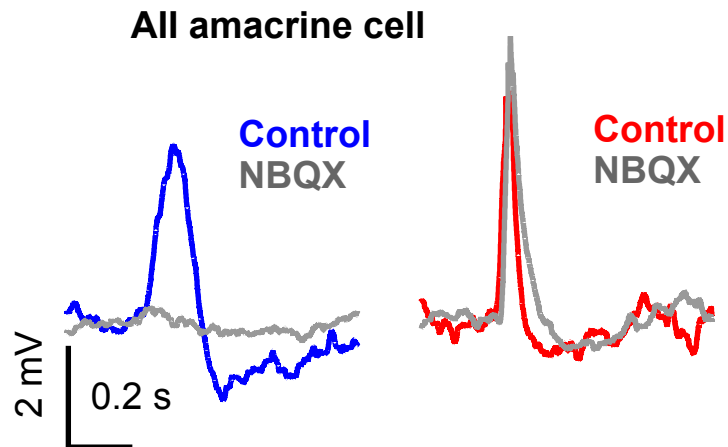**C**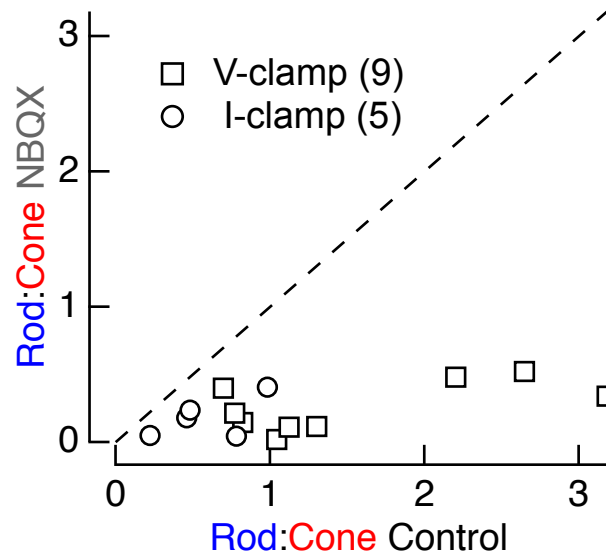

Supplement: supp [file elife-08033-supp-v1.zip]

**A**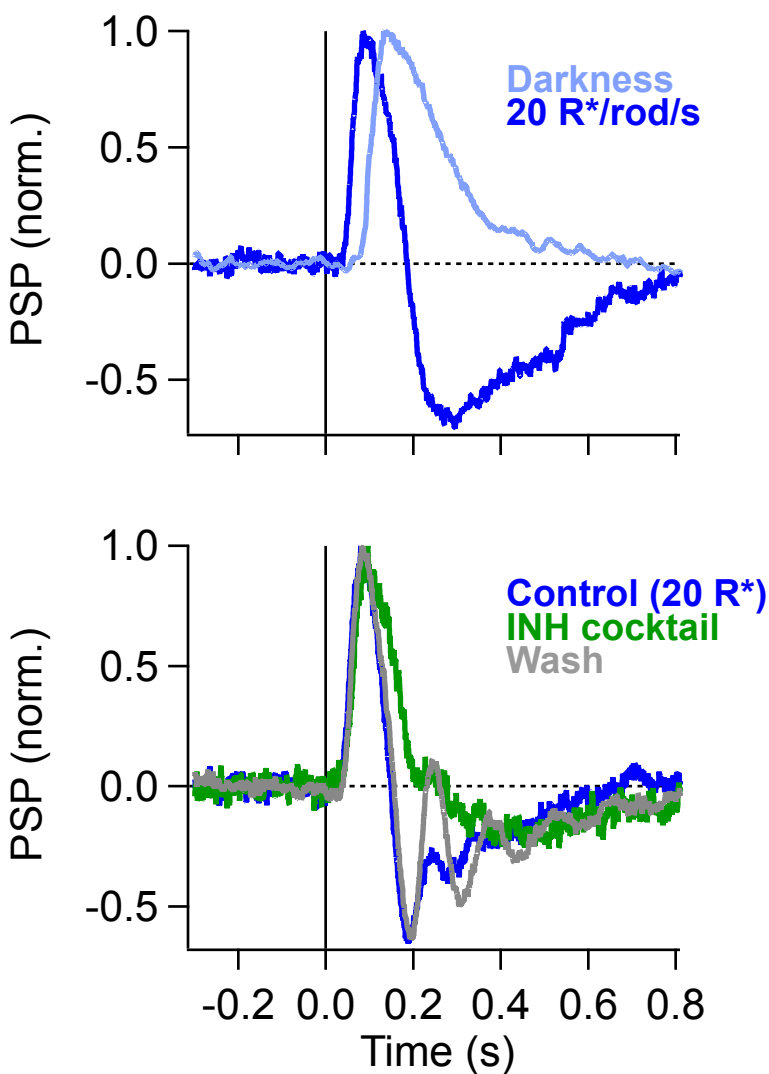**B**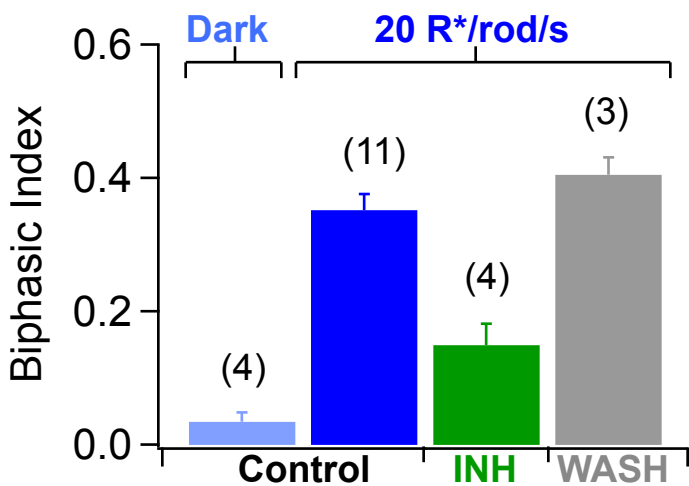**C**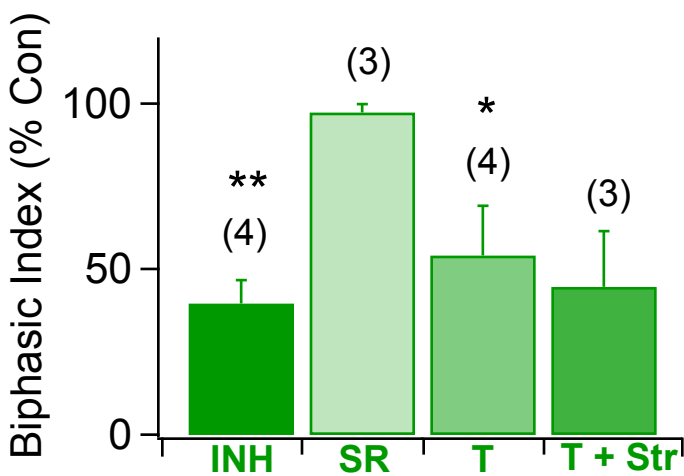

Supplement: supp [file elife-08033-supp-v1.zip]

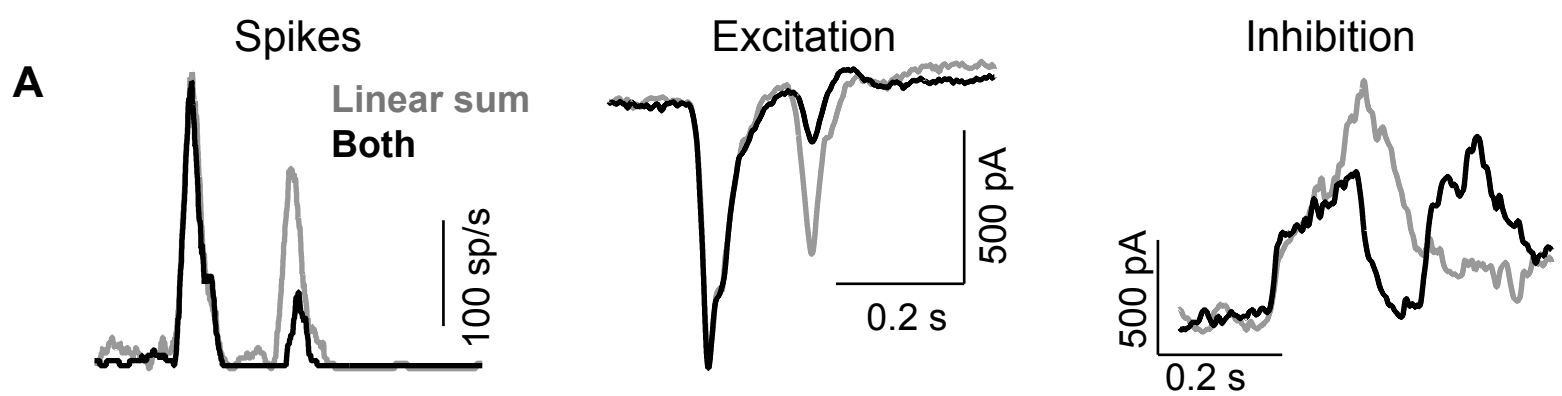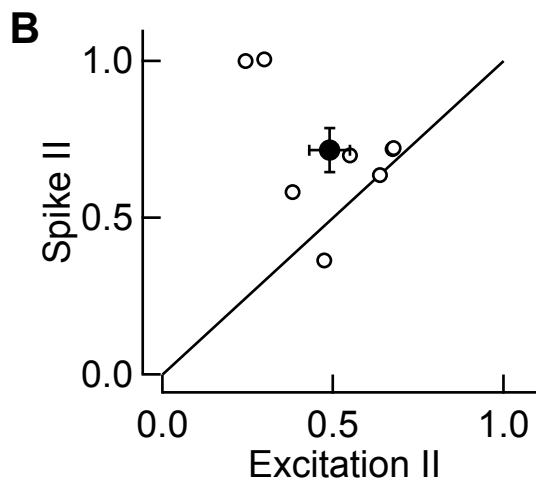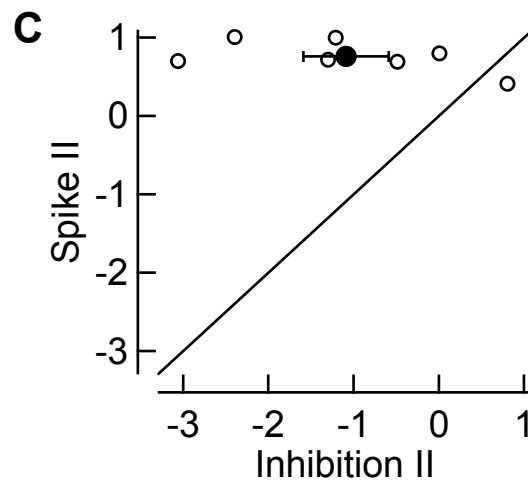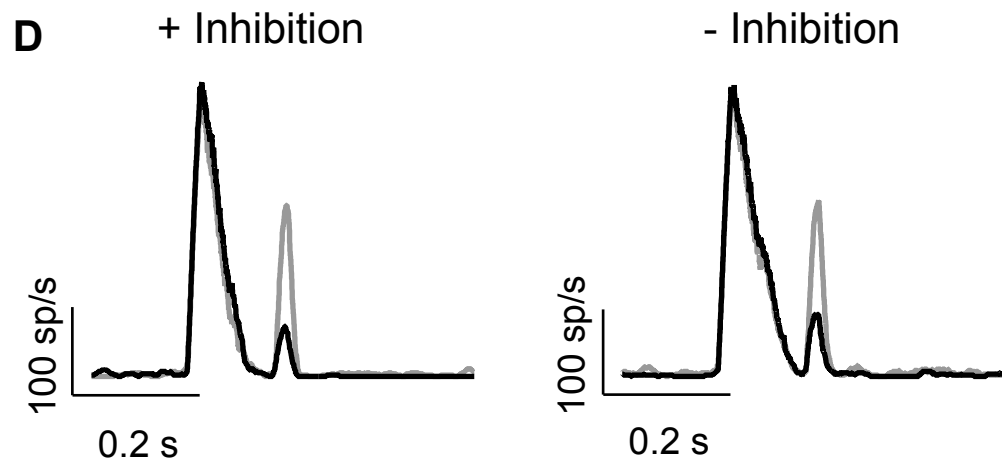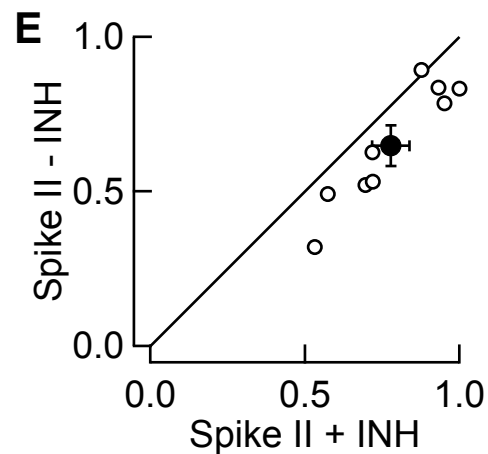

Supplement: supp [file elife-08033-supp-v1.zip]
